# Supplementary material for: Metabolic profile of Cortex Fraxini in rats using UHPLC combined with Fourier transform ion cyclotron resonance mass spectrometry
Source: Royal Society of Chemistry journal article supplement (doi:10.1039/c6ra01428c), 2016-01-01
Supplement: c6ra01428c1.pdf [file c6ra01428c1.pdf]

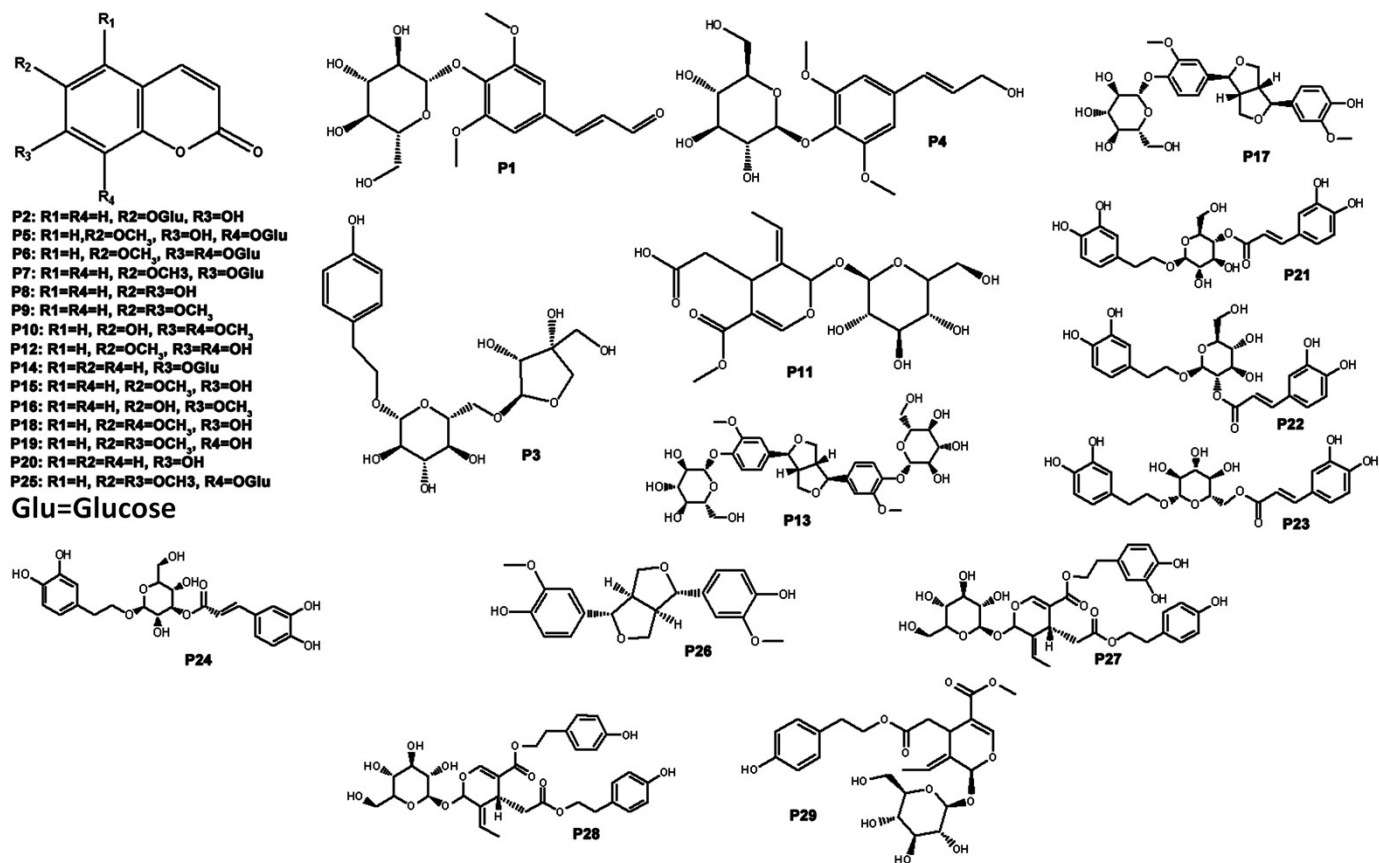

**Fig. S1** The chemical structures of prototype compounds detected by UHPLC-FT-ICR-MS

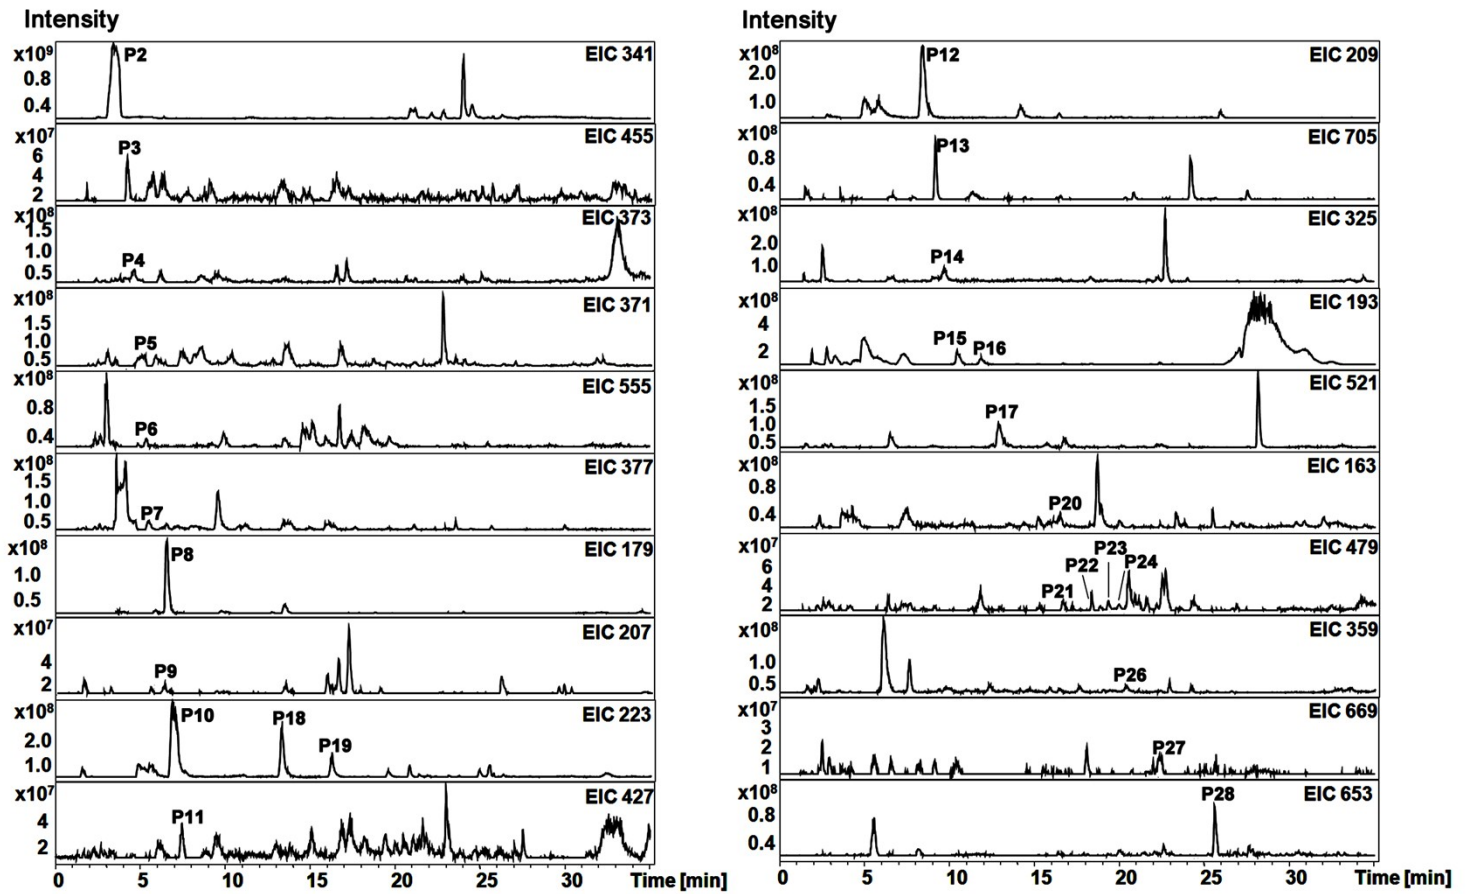

Fig. S2 Extracted ion chromatograms (EICs) for prototype compounds of Cortex Fraxini in urine samples

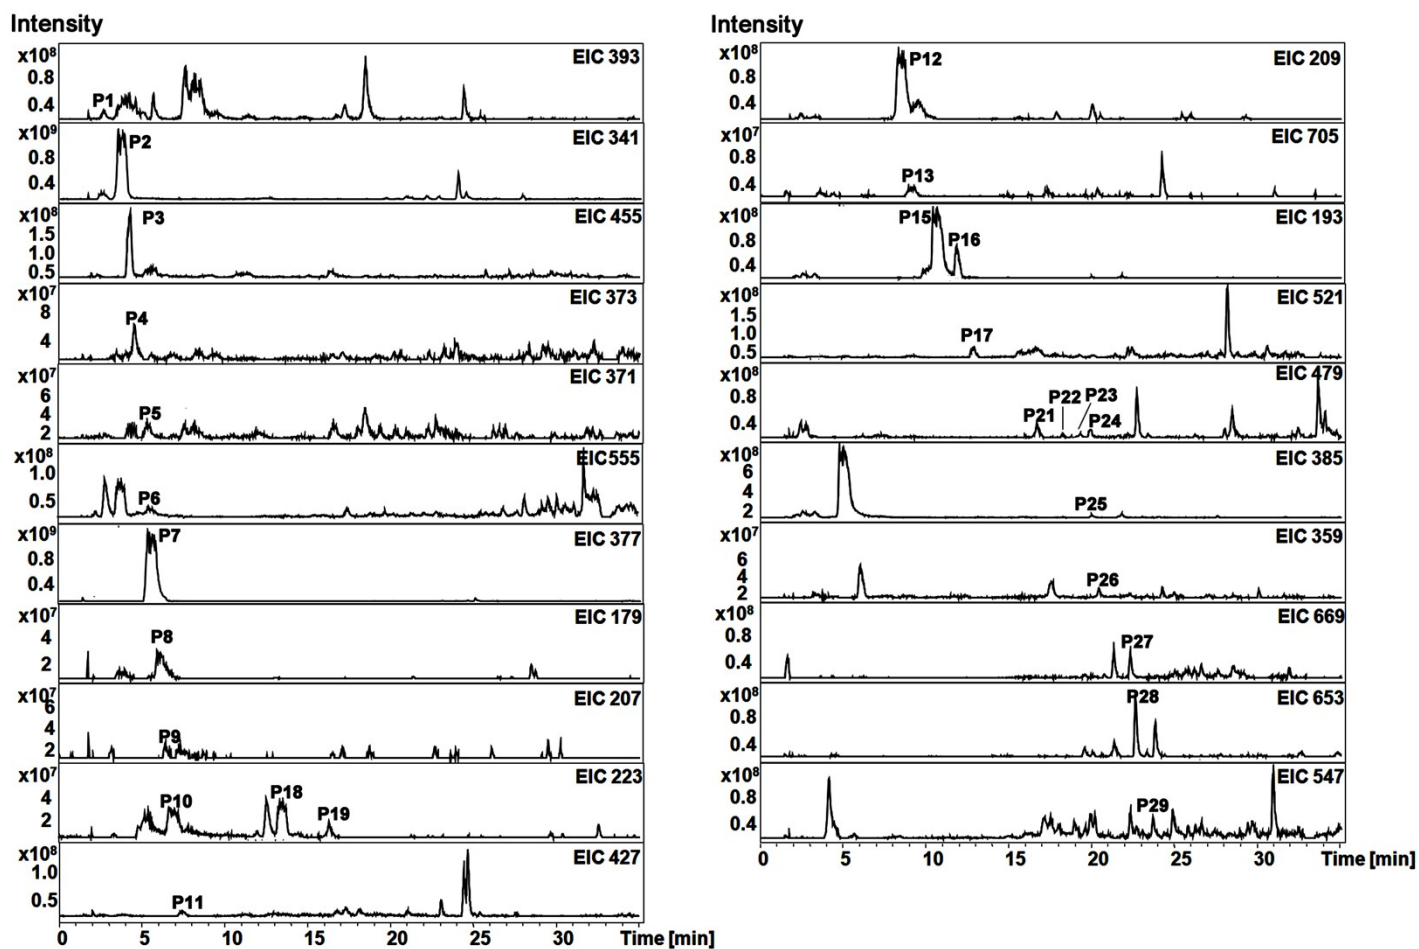

**Fig. S3** Extracted ion chromatograms (EICs) for prototype compounds of Cortex Fraxini in bile samples

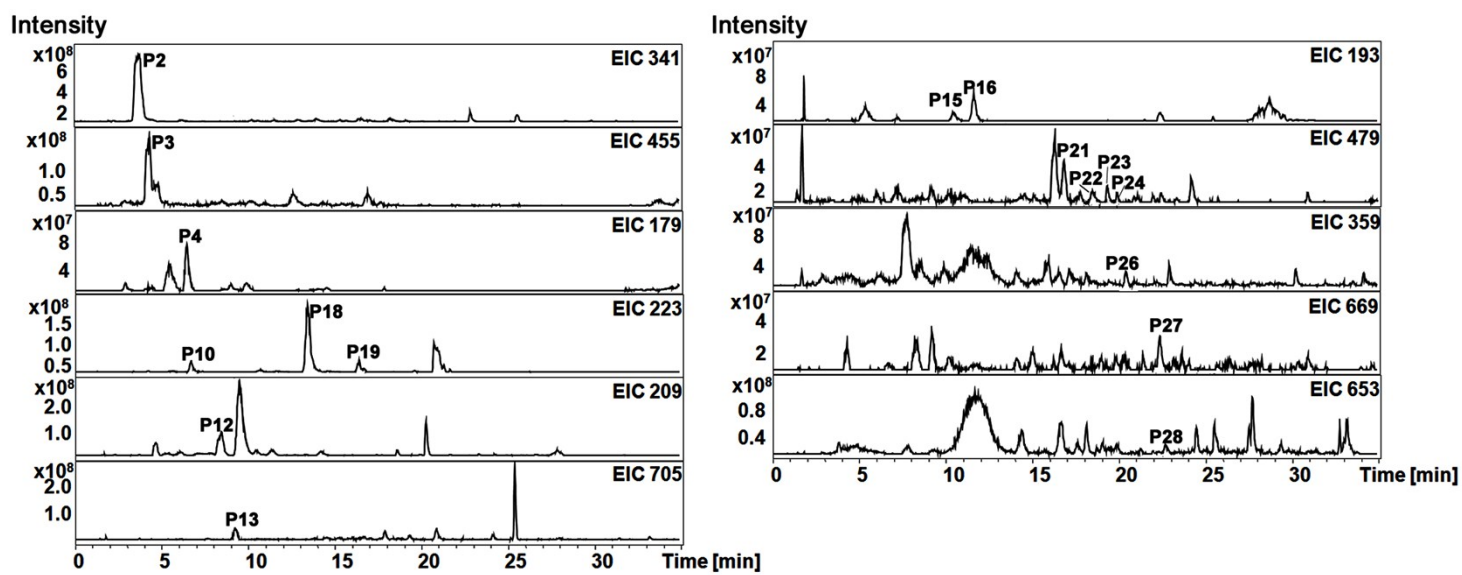

**Fig. S4** Extracted ion chromatograms (EICs) for prototype compounds of Cortex Fraxini in feces samples

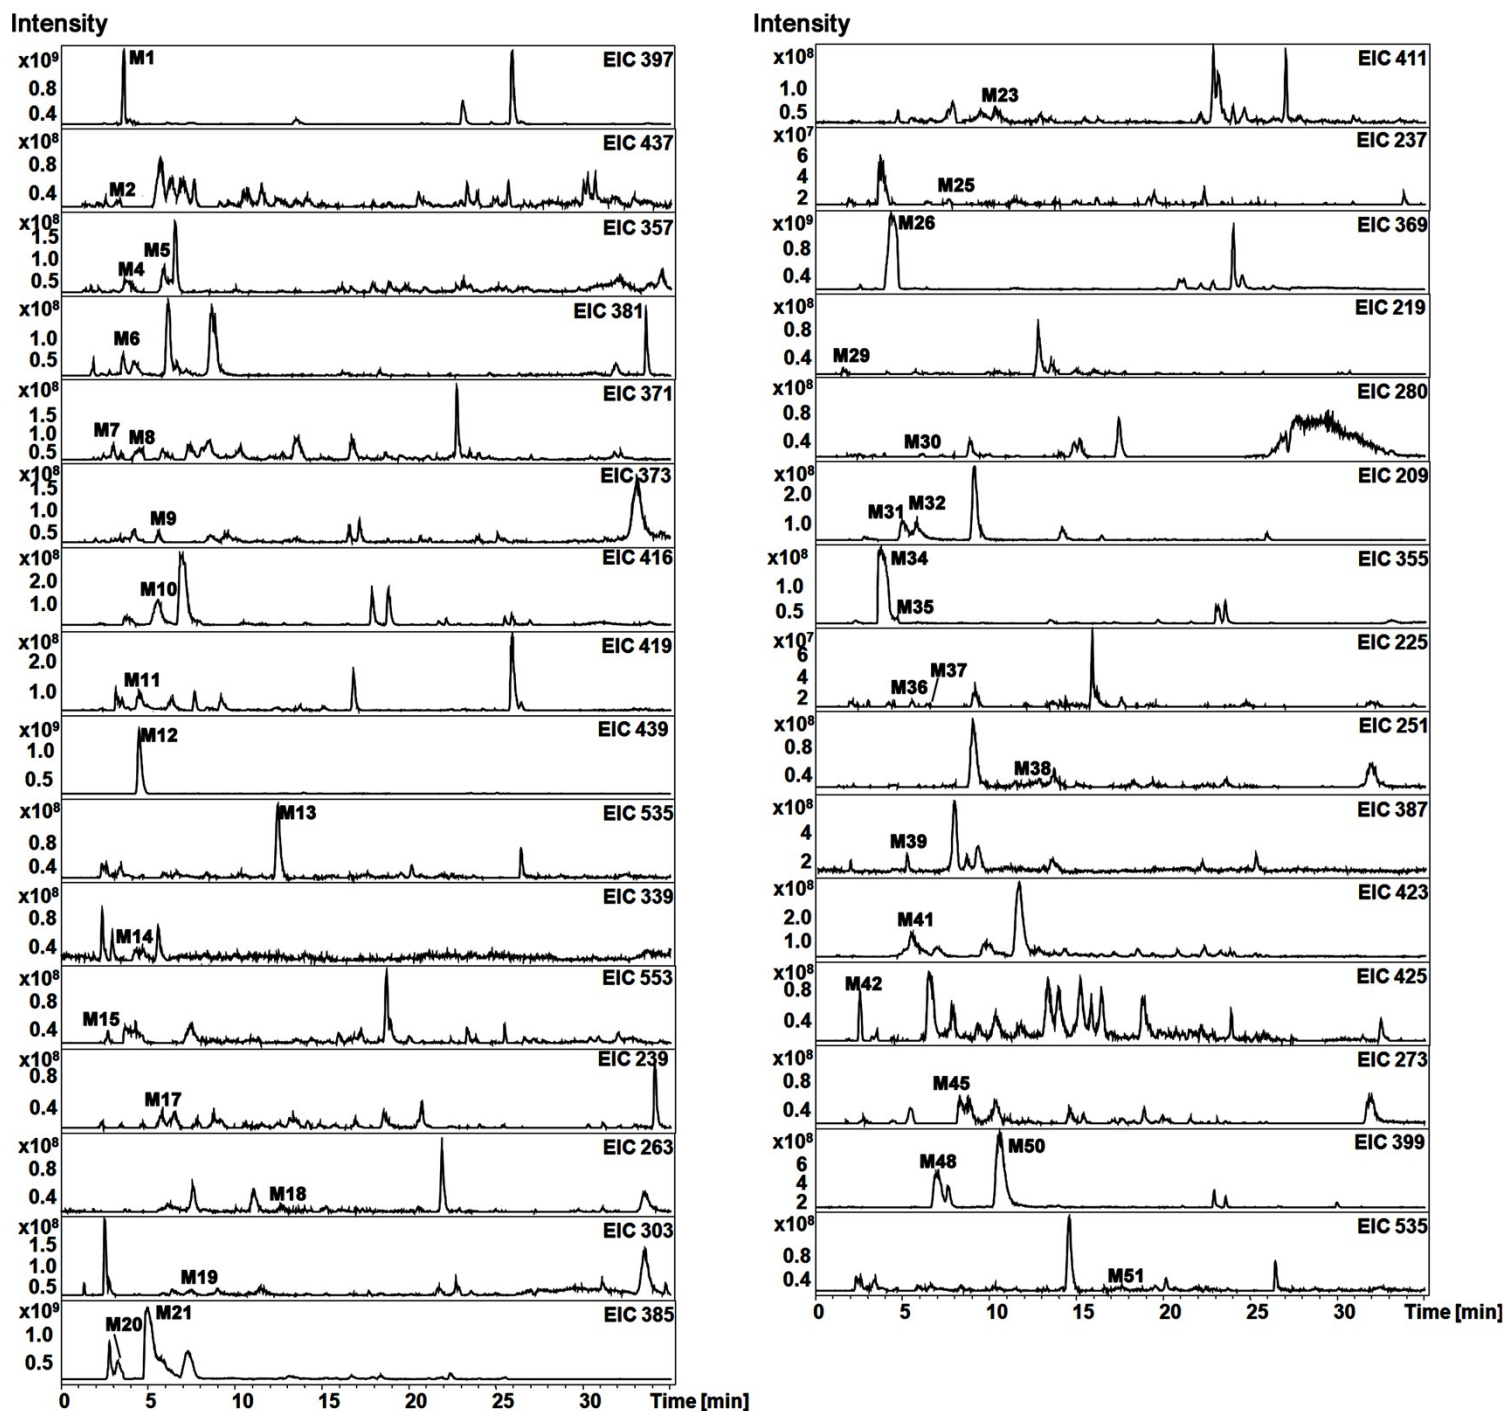

Fig. S5 Extracted ion chromatograms (EICs) for metabolites of Cortex Fraxini in urine samples

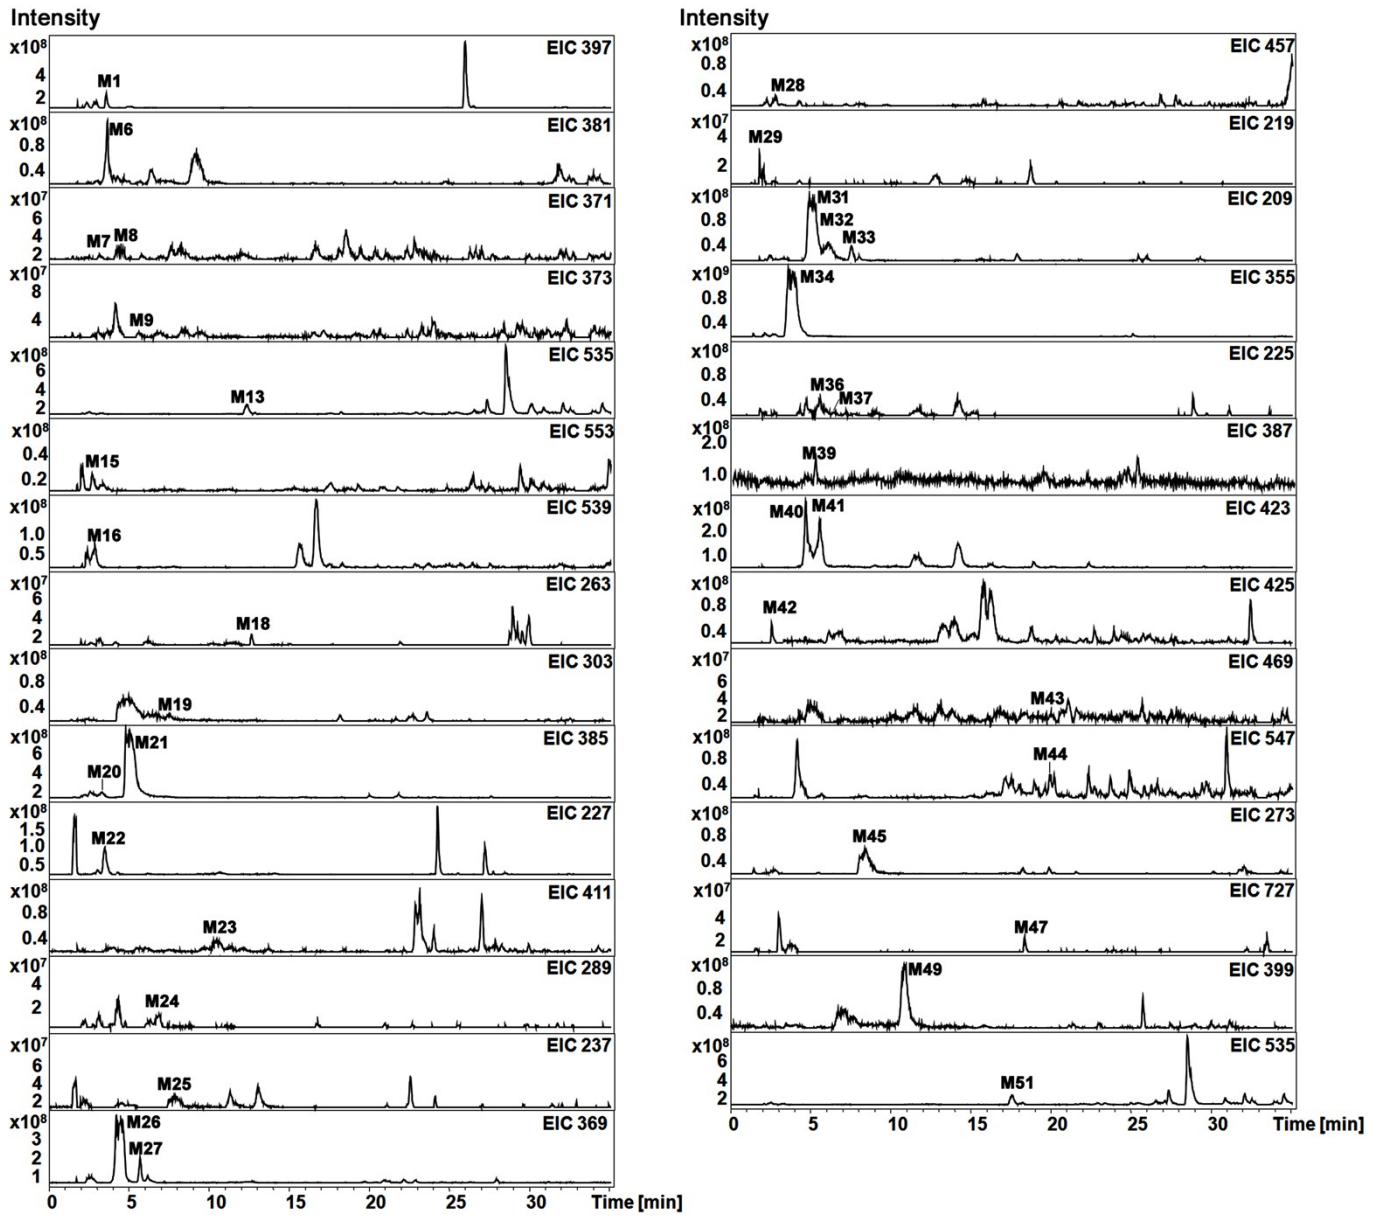

Fig. S6 Extracted ion chromatograms (EICs) for metabolites of Cortex Fraxini in bile samples

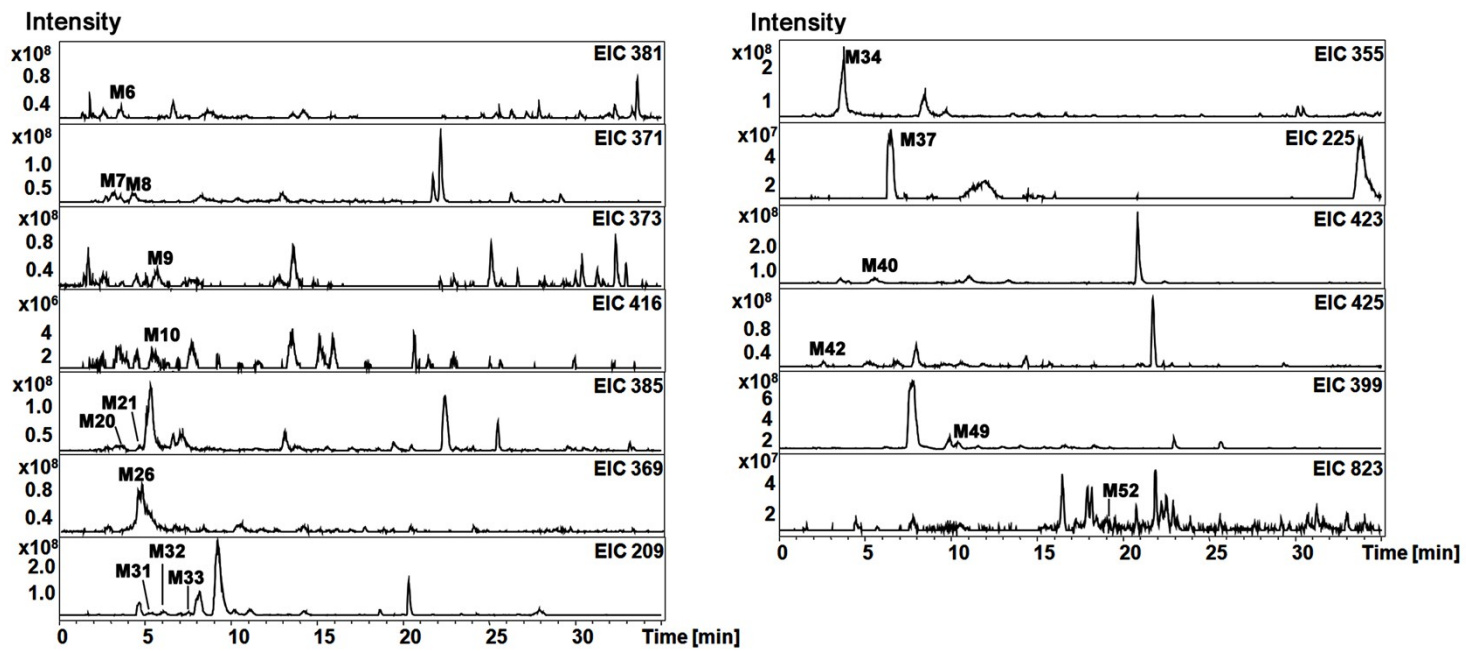

Fig. S7 Extracted ion chromatograms (EICs) for metabolites of Cortex Fraxini in feces samples
